# Supplementary material for: Novel Pathogenic Mucorales Identified Using the Silkworm Infection Model
Source: MDPI journal article supplement (doi:10.3390/jof7110995), 2021-11-22
Supplement: s1 [file s1]

# Supplementary information to: Novel pathogenic *Mucorales* identified using the silkworm infection model

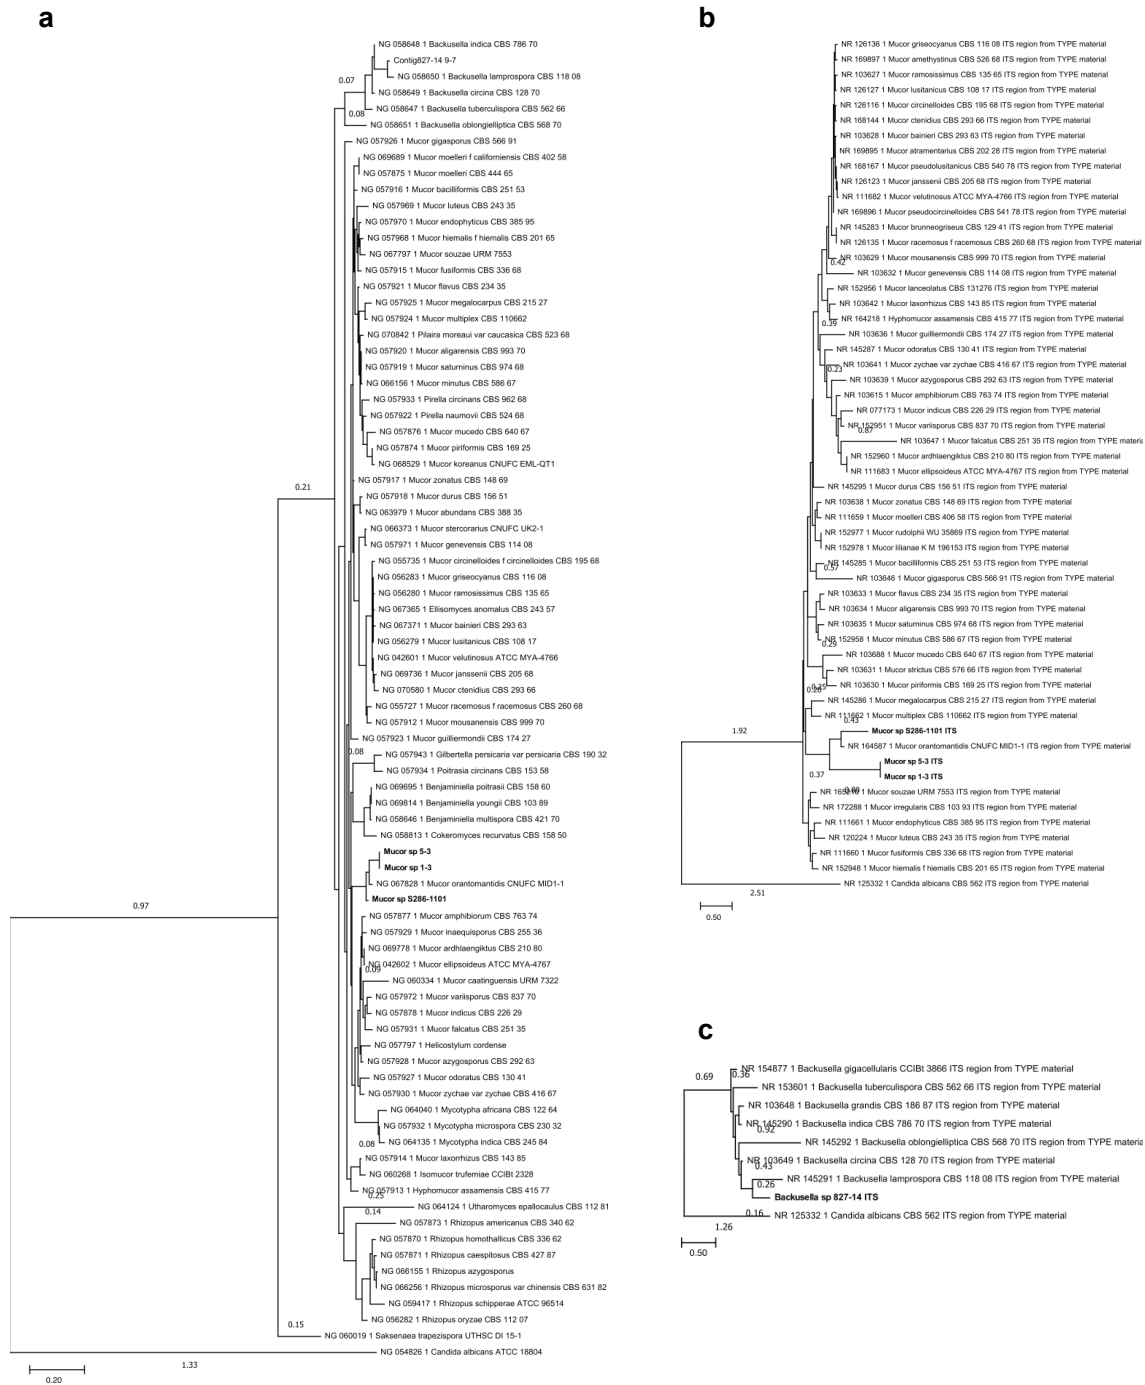

Supplementary Figure S1. LSU rRNA (a) and ITS (b-c) based phylogenetic analysis of novel *Mucorales* analyzed using MAFFT and RAxML. (a) Both *Mucor* spp and *Backusella* spp (b) *Mucor* spp, and (c) *Backusella* spp.

|                              |                                                               |     |
|------------------------------|---------------------------------------------------------------|-----|
| <i>Backusella</i> sp. 827-14 | AAAAGAAAATAACAATGATTTCCCTAGTAACGGCGAGTGAAGAGGAAAGAGCTCAAAGTT  | 60  |
| <i>Mucor</i> sp. 1-3         | AAAAGAAAATAACCATGATTTCCCTAGTAACGGCGAGTGAAGAGGAAAGAGCTCAAAGTT  | 60  |
| <i>Mucor</i> sp. 5-3         | AAAAGAAAATAACCATGATTTCCCTAGTAACGGCGAGTGAAGAGGAAAGAGCTCAAAGTT  | 60  |
| <i>Mucor</i> sp. S286-1101   | AAAAGAAAATAACAATGATTTCCCTAGTAACGGCGAGTGAAGAGGAAAGAGCTCAAAGTT  | 60  |
|                              | *****                                                         |     |
| <i>Backusella</i> sp. 827-14 | GGAATCCGGCTGCCCTAGGTAGTTGGAGTTGTAACTGGAGAGGTGTTTCCAGGCGAGC    | 120 |
| <i>Mucor</i> sp. 1-3         | GGAACCTGTTTGGCTTAGCTAAACCGGATTGTAACTGTAGAGGTGTTTCCAGGCGAGC    | 120 |
| <i>Mucor</i> sp. 5-3         | GGAACCTGTTTGGCTTAGCTAAACCGGATTGTAACTGTAGAGGTGTTTCCAGGCGAGC    | 120 |
| <i>Mucor</i> sp. S286-1101   | GGAACCTGTTTGGCTTAGCTAAACCGGATTGTAACTGTAGAGGTGTTTCCAGGCGAGC    | 120 |
|                              | **** * * * * *                                                |     |
| <i>Backusella</i> sp. 827-14 | CAAGCAAATAAGTCCTTTGGAACGGGCGATCATAGAGGGTGAGAATCCCGTCTTTGGCTT  | 180 |
| <i>Mucor</i> sp. 1-3         | TTGGTAAATAAGTCCTTTGGAACGGGCGATCATAGAGGGTGAGAATCCCGTCTTTGGCTT  | 180 |
| <i>Mucor</i> sp. 5-3         | TTGGTAAATAAGTCCTTTGGAACGGGCGATCATAGAGGGTGAGAATCCCGTCTTTGGCTT  | 180 |
| <i>Mucor</i> sp. S286-1101   | CTGGCAAATAAGTCCTTTGGAACGGGCGATCATAGAGGGTGAGAATCCCGTCTTTGGCTT  | 180 |
|                              | * *****                                                       |     |
| <i>Backusella</i> sp. 827-14 | GAGCTATTCGCCTTTTGGGATACACTTTCAAAGAGTCAGGTTGTTTGGGAATGCAGCCTA  | 240 |
| <i>Mucor</i> sp. 1-3         | AAGCAGT-TGTCCTTTTGTGATACACTTTCAAAGAGTCAGGTTGTTTGGGAATGCAGCCTA | 239 |
| <i>Mucor</i> sp. 5-3         | AAGCAGT-TGTCCTTTTGTGATACACTTTCAAAGAGTCAGGTTGTTTGGGAATGCAGCCTA | 239 |
| <i>Mucor</i> sp. S286-1101   | GAGCAG--TGTCCTTTTGTGATACACTTTCAAAGAGTCAGGTTGTTTGGGAATGCAGCCTA | 238 |
|                              | *** * *****                                                   |     |
| <i>Backusella</i> sp. 827-14 | AATTGGGTGGTAAATCTCACCTAAAGCTAAATATGGGCGAGAGACCGATAGCGAACAAGT  | 300 |
| <i>Mucor</i> sp. 1-3         | AATTGGGTGGTAAATCTCACCTAAAGCTAAATATCTGCGAGAGACCGATAGCGAACAAGT  | 299 |
| <i>Mucor</i> sp. 5-3         | AATTGGGTGGTAAATCTCACCTAAAGCTAAATATCTGCGAGAGACCGATAGCGAACAAGT  | 299 |
| <i>Mucor</i> sp. S286-1101   | AATTGGGTGGTAAATCTCACCTAAAGCTAAATATCTGCGAGAGACCGATAGCGAACAAGT  | 298 |
|                              | *****                                                         |     |
| <i>Backusella</i> sp. 827-14 | ACCGTGAGGGAAAGATGAAAAGAACTTTGAAAAGAGAGTTAAACAGTATGTGAAATTGTT  | 360 |
| <i>Mucor</i> sp. 1-3         | ACCGTGAGGGAAAGATGAAAAGAACTTTGAAAAGAGAGTTAAACAGTACGTGAAATTGTT  | 359 |
| <i>Mucor</i> sp. 5-3         | ACCGTGAGGGAAAGATGAAAAGAACTTTGAAAAGAGAGTTAAACAGTACGTGAAATTGTT  | 359 |
| <i>Mucor</i> sp. S286-1101   | ACCGTGAGGGAAAGATGAAAAGAACTTTGAAAAGAGAGTTAAACAGTACGTGAAATTGTT  | 358 |
|                              | *****                                                         |     |
| <i>Backusella</i> sp. 827-14 | GAAAGGGAACCGTTTGGAGCCAGACCGGCCGTTCTATAATCAATCTCTGCCTCGGTGGGG  | 420 |
| <i>Mucor</i> sp. 1-3         | AAAATGGAACCGTTTGAAGCCAGATTGGCTTGGTTGTAATCAATCTAGGATTGCTCCTGG  | 419 |
| <i>Mucor</i> sp. 5-3         | AAAATGGAACCGTTTGAAGCCAGATTGGCTTGGTTGTAATCAATCTAGGATTGCTCCTGG  | 419 |
| <i>Mucor</i> sp. S286-1101   | AAAATGGAACCGTTTGAAGCCAGACTGGCTTGGTTGTAATCAATCTAGGATTGCTCCTGG  | 418 |
|                              | *** ***** * *****                                             |     |
| <i>Backusella</i> sp. 827-14 | ATGCACTTGTAGGACGTTGGCCTGCCAACAGCAATTTTGTCTGGTGGAAAAAACAGGAG   | 480 |
| <i>Mucor</i> sp. 1-3         | ATGCAGTTGCAGC--CTATGCCTGCCAACGACAGTTTCTTCTGAGGGAAAAAGCCATTGG  | 477 |
| <i>Mucor</i> sp. 5-3         | ATGCAGTTGCAGC--CTATGCCTGCCAACGACAGTTTCTTCTGAGGGAAAAAGCCATTGG  | 477 |
| <i>Mucor</i> sp. S286-1101   | ATGCAGTTGCAGC--CTATGCCTGCCAACGACAGTTTCTTCTGAGGGAAAAAGCTAGAGG  | 476 |
|                              | ***** ** * ***** ** ***** * *                                 |     |
| <i>Backusella</i> sp. 827-14 | GAATGTGGCCCTTCGGGGTGTATAGCCTCCCGGAAAATACATCGGACGGGATTGAGGAC   | 540 |
| <i>Mucor</i> sp. 1-3         | AAATGTGGCCCTTCGGGGTGTATAGTCTTTGGAAAATACCTTGGGAAAGACTGAGGAA    | 537 |
| <i>Mucor</i> sp. 5-3         | AAATGTGGCCCTTCGGGGTGTATAGTCTTTGGAAAATACCTTGGGAAAGACTGAGGAA    | 537 |
| <i>Mucor</i> sp. S286-1101   | AAATGTGGCCCTTCGGGGTGTATAGTCTTTAGAAAATACCTTGGAAAGAGACTGAGGAA   | 536 |
|                              | ***** ***** * ***** * * *****                                 |     |
| <i>Backusella</i> sp. 827-14 | TGCAGTAAATGCCTTTAGGCG-AAATACCTGGGCGCTTGTGTTGAGGACGTGTAGAATCT  | 599 |
| <i>Mucor</i> sp. 1-3         | CGCAGTGGATGCCTTTATGGCAAGATTGCTGAGTGCTTTTGCTGATGTATGCTAGAATTT  | 597 |
| <i>Mucor</i> sp. 5-3         | CGCAGTGGATGCCTTTATGGCAAGATTGCTGGGTGCTTTTGCTAATGTATGCTAGAATTT  | 597 |
| <i>Mucor</i> sp. S286-1101   | CGCAGTGAATGCCTTTA-GGCAAGATTGCTGGGCGCTTTGTTGATACATGCTAGAATTT   | 595 |
|                              | ***** ***** * * ***** * * ***** *                             |     |
| <i>Backusella</i> sp. 827-14 | CTGCTTCGGGTGGTGTCTAGCTCT-AATGTGCAACTCGCCTAGATTATTTTCTATTGCT   | 658 |
| <i>Mucor</i> sp. 1-3         | CTGCCTTGGGTGGTGTCTAGTGTACAAAGGTAAACTCGCTTGGTATATTTTTCATCCGCT  | 657 |
| <i>Mucor</i> sp. 5-3         | CTGCCTTGGGTGGTGTCTAGTGTACAAAGGTAAACTCGCTTGGTATATTTTTCATCCGCT  | 657 |
| <i>Mucor</i> sp. S286-1101   | CTGCTTCGGGTGGTGTCTAGTGTAAAGATGGAACCTCGTTAGTATATTTTTCATTCACT   | 655 |
|                              | *** * ***** * * ***** * * ***** ** *                          |     |
| <i>Backusella</i> sp. 827-14 | TAGGTTGTTGGCTTAATGACTCTAAATGAC                                | 688 |
| <i>Mucor</i> sp. 1-3         | TAGGTTGTTGGCTTAATGACTTTAAATCAC                                | 687 |
| <i>Mucor</i> sp. 5-3         | TAGGTTGTTGGCTTAATGACTTTAAATCAC                                | 687 |
| <i>Mucor</i> sp. S286-1101   | TAGGTTGTTGGCTTAATGACTTTAAATCAC                                | 685 |
|                              | ***** *****                                                   |     |

**Supplementary Figure S2. Sequence alignment of LSU of newly identified Mucorales.**

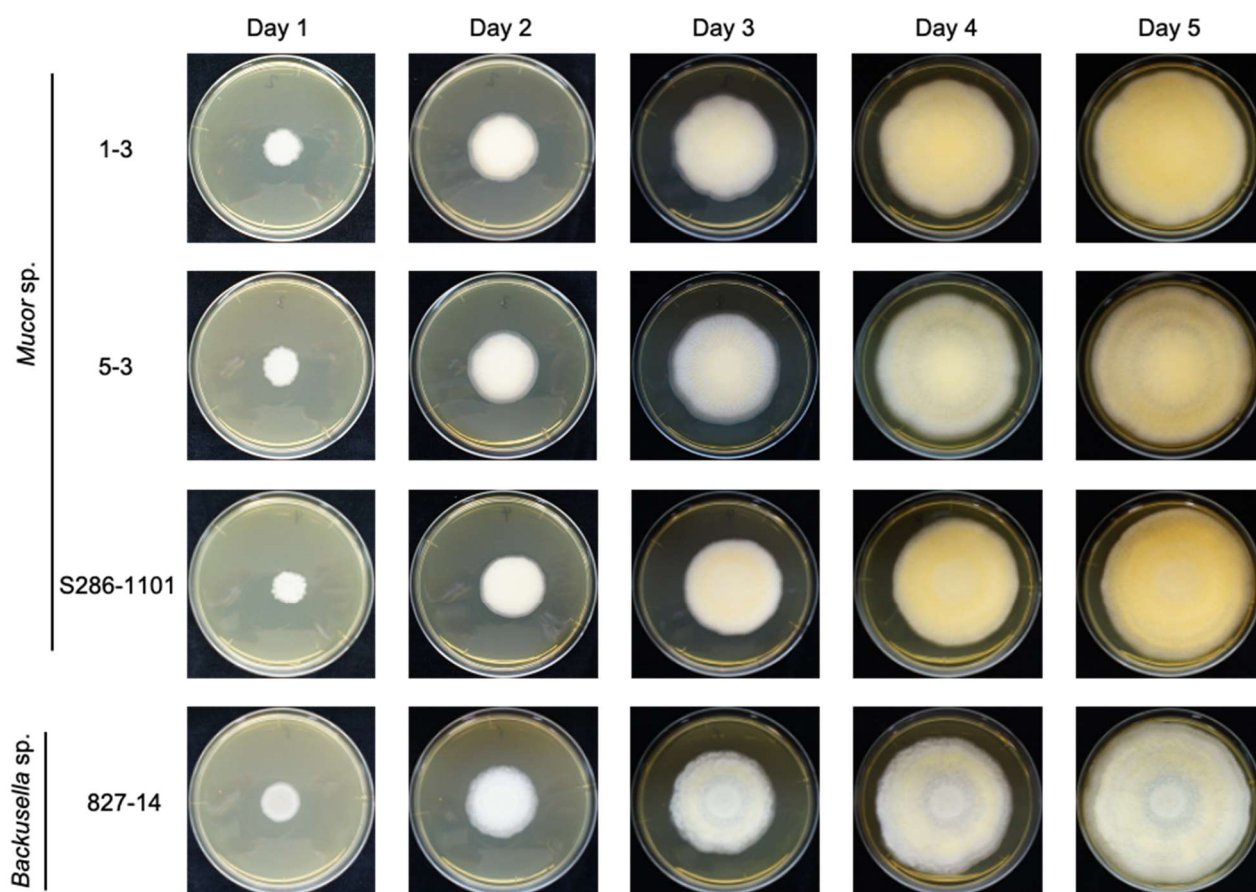

**Supplementary Figure S3. Growth of novel Mucorales.**  $4.0 \times 10^4$  spores contained in 40  $\mu$ l of normal saline were spotted at the center of the YPD agar plates, dried, incubated at 30°C, and growth was recorded every day until the 5<sup>th</sup> day.

**Supplementary Table S1. Pathogenicity of Mucorales spores in silkworm.** Fifty microliter spore suspensions with or without 1/8 dilution were injected into the silkworm hemolymph, and survival was recorded at 15 and 20 hrs. NR: Not Recorded

| Sample                       | No of spores/ml       | Dilution fold | Injected silkworms | Survival at |       |
|------------------------------|-----------------------|---------------|--------------------|-------------|-------|
|                              |                       |               |                    | 15 hr       | 20 hr |
| <i>Mucor</i> sp. 1-3         | 5.5 x 10 <sup>8</sup> | 1             | 3                  | NR          | 0/3   |
|                              |                       | 8             | 3                  | 2/3         | 1/3   |
| <i>Mucor</i> sp. 5-3         | 3.9 x 10 <sup>8</sup> | 1             | 3                  | NR          | 0/3   |
|                              |                       | 8             | 3                  | 3/3         | 2/3   |
| <i>Mucor</i> sp. S286-1101   | 3.5 x 10 <sup>8</sup> | 1             | 3                  | NR          | 0/3   |
|                              |                       | 8             | 3                  | 3/3         | 1/3   |
| <i>Backusella</i> sp. 827-14 | 4.5 x 10 <sup>7</sup> | 1             | 3                  | NR          | 0/3   |
|                              |                       | 8             | 3                  | 3/3         | 0/3   |
| Normal saline                | 0                     | NA            | 3                  | 3/3         | 3/3   |
